# Supplementary material
Source: publisher figshare collection journal article supplement (https://acs.figshare.com/ndownloader/files/4577305)

Figure S1: CD spectra of hRPA at three temperatures. 20 °C (—), 30 °C (— o —), and 37 °C (— •• —). Concentration of the RPA was about 5  $\mu$ M in Binding Buffer (200 mM KCl, 20 mM Tris-HCl, pH 7.4, 10  $\mu$ M ZnCl<sub>2</sub>, 1 mM DTT, and 1.5 mM MgCl<sub>2</sub>) plus 3% (v/v) glycerol. Spectra at the three temperatures were identical to within the error of measurement. Spectra are plotted as  $\epsilon_L - \epsilon_R$  in units of  $M^{-1}cm^{-1}$ , per mole of residue.

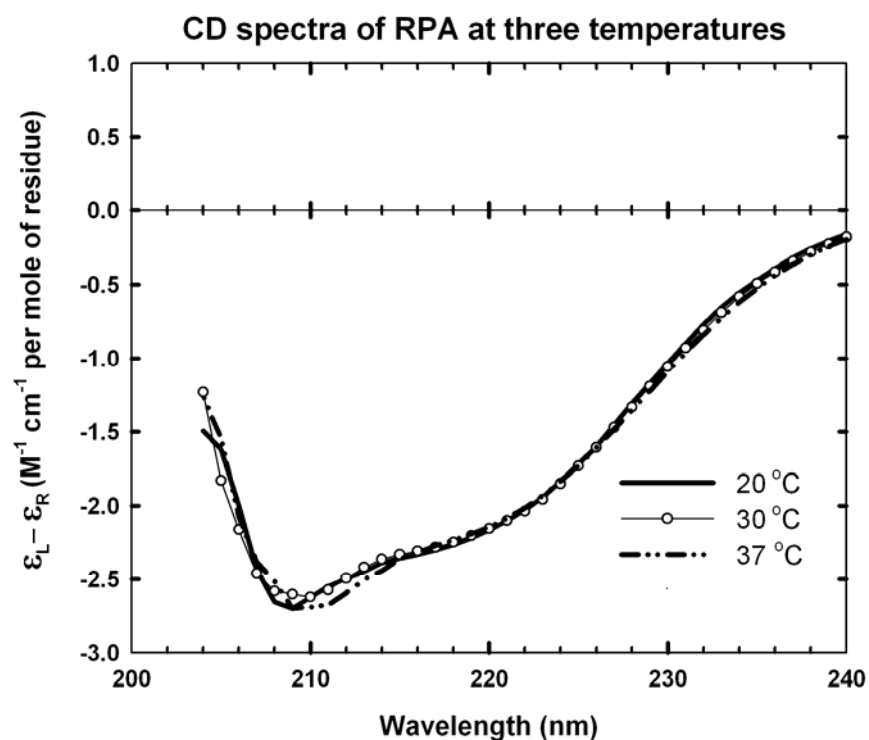

Figure S2. Binding profiles of EMSA results of  $^{32}\text{P}$ -labeled DNAs titrated with hRPA: I-3 at (A) room temperature (RT) or (B) 37 °C; I-3c26 at (C) RT or (D) 37 °C; (E) G-8c26 at 37 °C; (F) RI-1 at 37 °C; and (G) I-7 at 37 °C. Graphs are the averages of two to eight experiments. Error bars are the ranges of values of two individual experiments for all but panels C, D, and F, in which cases error bars are the standard deviations of four, eight and three experiments, respectively. Error bars are shown only for the percentage of labeled complexes in panels C and D. Free oligomer (—■—); C1, or C1 + C2 plus any complexes of mobility intermediate to C1 and C2 (—●—); C2, or C2 + Cn (—○—) (see text).

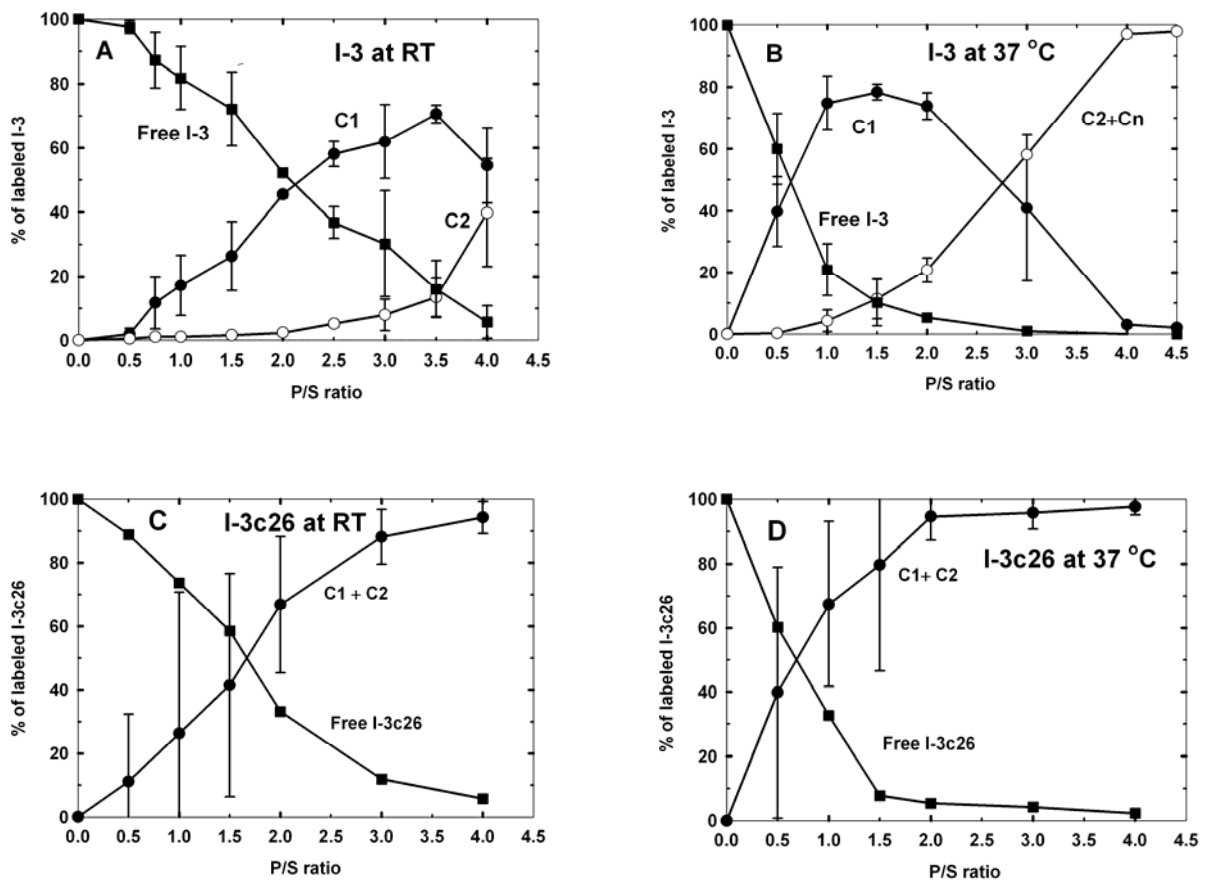

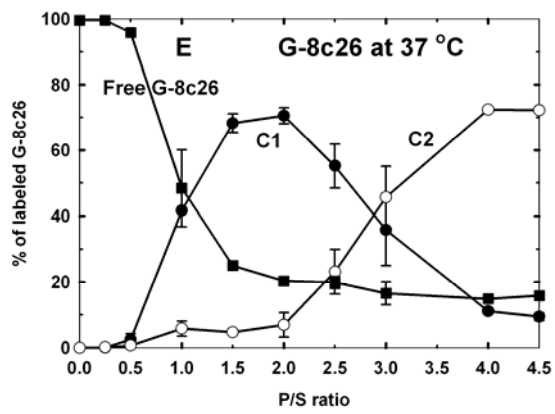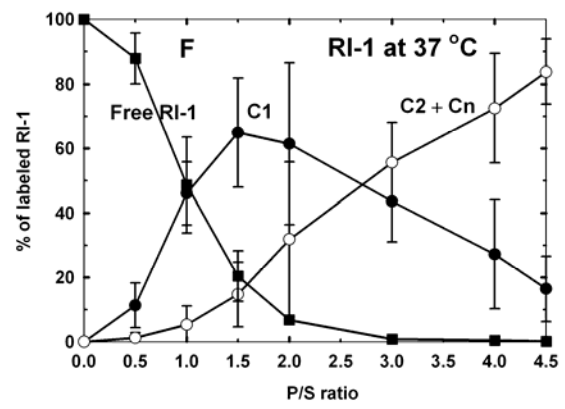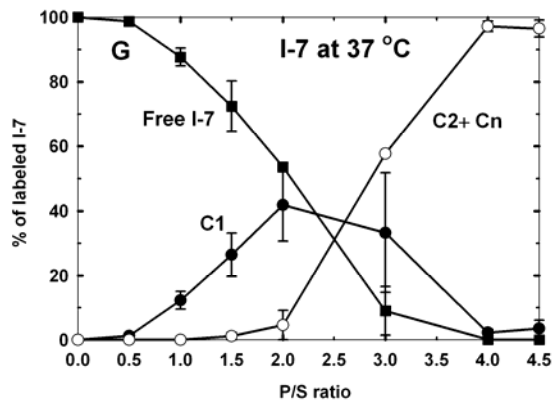

Figure S3. EMSA results for titration of the  $^{32}\text{P}$ -labeled I-3c26comp oligomer with hRPA. (A) Representative EMSA gel. (B) Binding profile from five sets of EMSA titrations of I-3c26comp with hRPA. Error bars are the standard deviations for the percentage of labeled complexes.

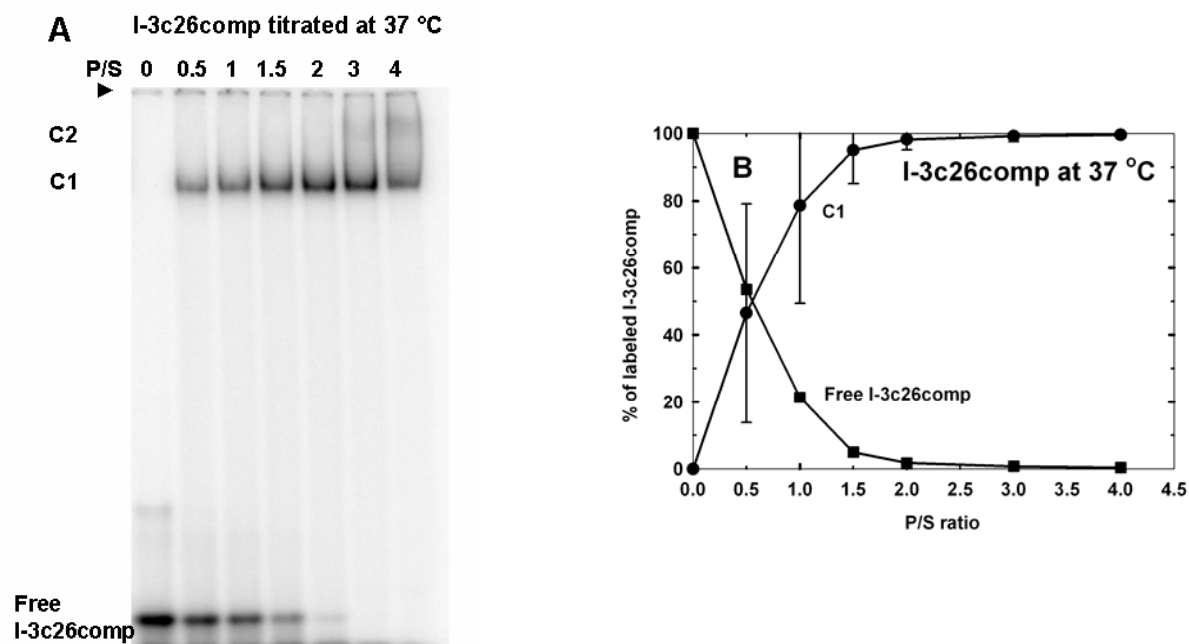

Supplement: Supplementary file 1 [file 4577305]
